# Supplementary material for: Curcumin I-SMA nanomicelles as promising therapeutic tool to tackle bacterial infections
Source: Royal Society of Chemistry journal article supplement (doi:10.1039/d3ra04885c), 2023-01-01
Supplement: d3ra04885c1.pdf [file d3ra04885c1.pdf]

# Curcumin I-SMA nanomicells as promising therapeutic tool to tackle bacterial infections

Nicola F. Virzi,<sup>[a]</sup> Antonino N. Fallica,<sup>[a]</sup> Giuseppe Romeo,<sup>[a]</sup> Khaled Greish,<sup>[b]</sup> Maha Ali Alghamdi,<sup>[b]</sup> Salvatore Patanè,<sup>[c]</sup> Antonino Mazzaglia,<sup>[d]</sup> Mohammad Shahid,<sup>[e]</sup> and Valeria Pittalà,<sup>\*,[a,b]</sup>

[a] N.F. Virzi, PhD A.N. Fallica, Prof. G. Romeo, Prof. V. Pittalà  
Department of Drug and Health Science  
University of Catania  
Viale A. Doria 6, 95125 – Catania (Italy)  
E-mail: [valeria.pittalà@unicat.it](mailto:valeria.pittalà@unicat.it)

[b] Prof. K. Greish, M.A. Alghamdi, Prof. V. Pittalà  
Department of Molecular Medicine,  
Arabian Gulf University  
Manama 329 (Bahrain)

[c] Department of Mathematical and Computer Sciences, Physical Sciences and Earth Sciences, University of Messina V.le F. Stagno D'Alcontres, 31 98166 Messina, Italy

[d] Dr. A. Mazzaglia  
National Council of Research, Institute for the Study of Nanostructured Materials (CNR-ISMN), URT of Messina c/o Department of Chemical, Biological, Pharmaceutical and Environmental Sciences, University of Messina, V.le F. Stagno d'Alcontres 31, 98166 Messina, Italy

[e] Prof. M. Shahid  
Department of Microbiology & Immunology  
Arabian Gulf University  
Manama 329 (Bahrain)

## SUPPORTING INFORMATION

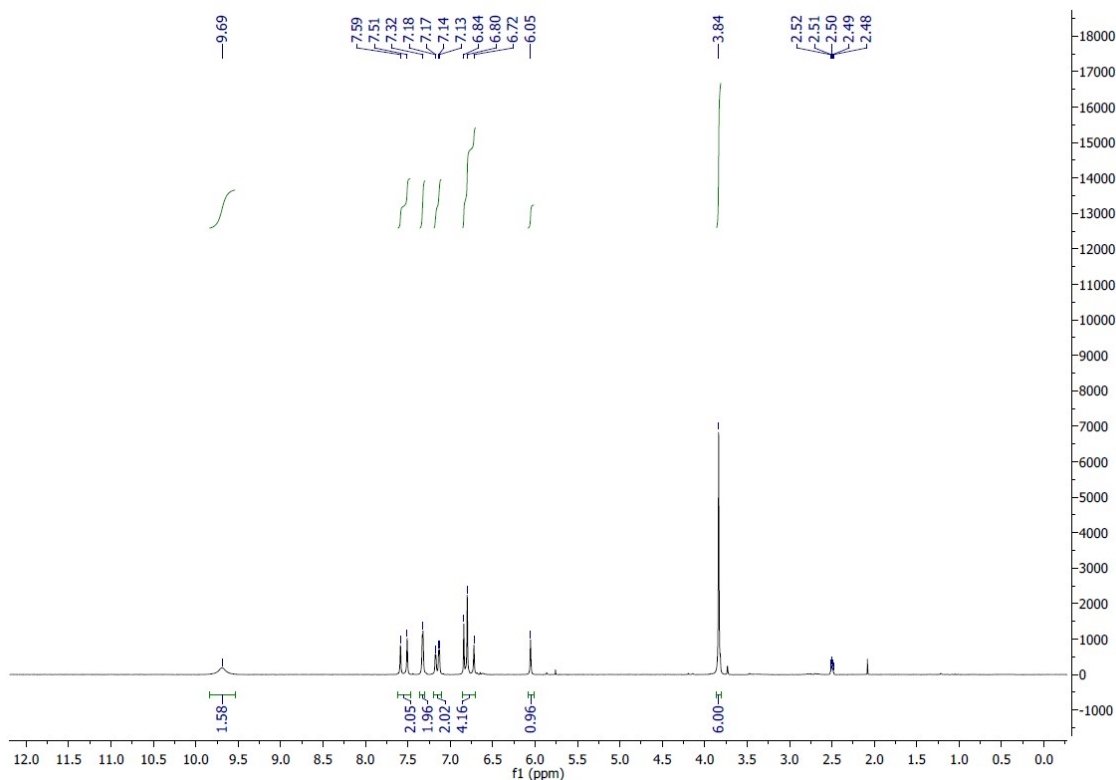

Figure S1. <sup>1</sup>H NMR (200 MHz, DMSO-d<sub>6</sub>) of CUR-I.

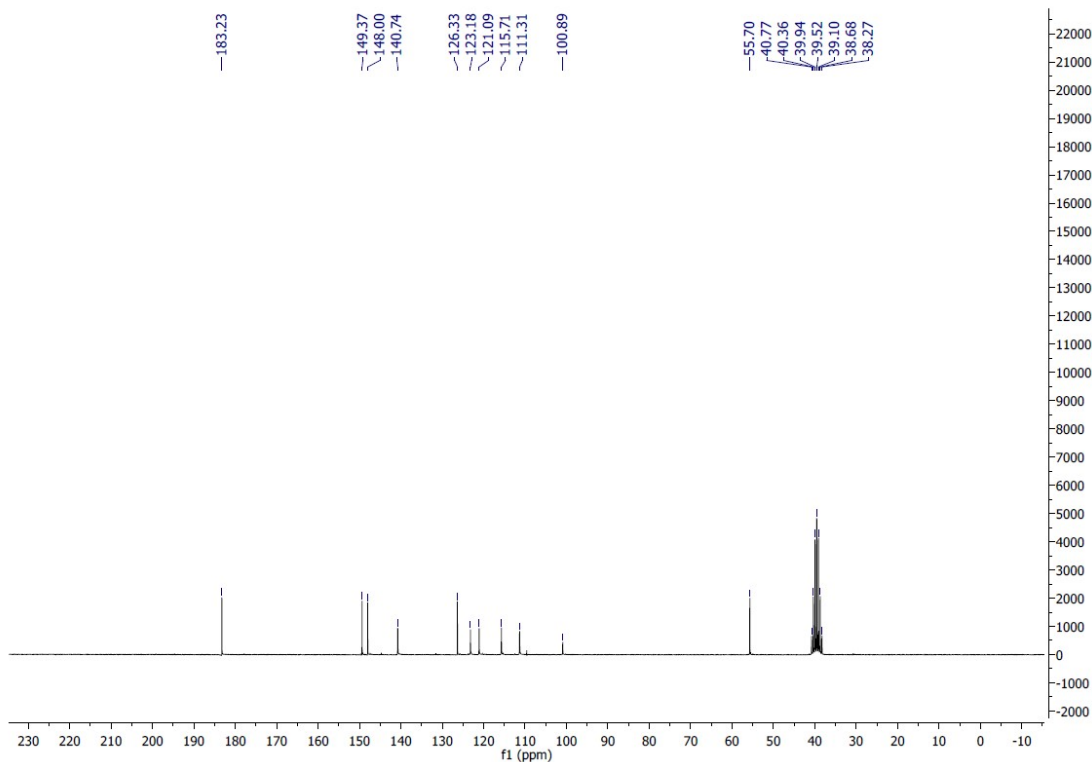

**Figure S2.**  $^{13}\text{C}$  NMR (50 MHz,  $\text{DMSO-}d_6$ ) of CUR-I.

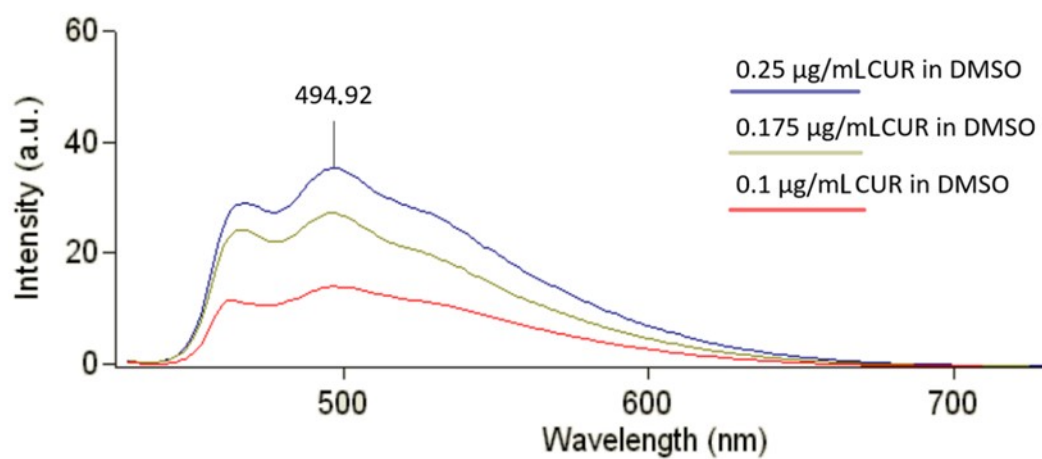

**Figure S3.** Fluorescence spectra of Curcumin I in  $\text{DMSO}$ . The emission spectra of curcumin were obtained by irradiation with a  $\lambda_{\text{exc}}$  of 405 nm and scanning from 425 to 780 nm.

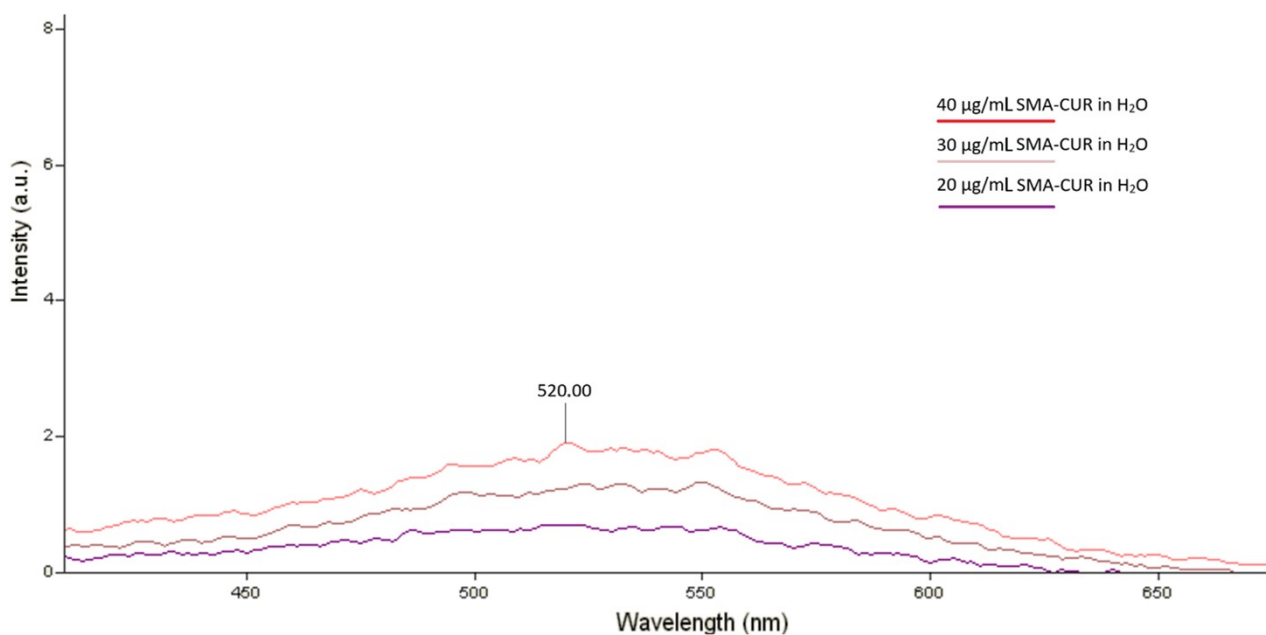

**Figure S4.** SMA-CUR in DDW. The emission spectra were obtained by irradiation with a  $\lambda_{exc}$  of 350 nm and scanning from 400 to 680 nm.

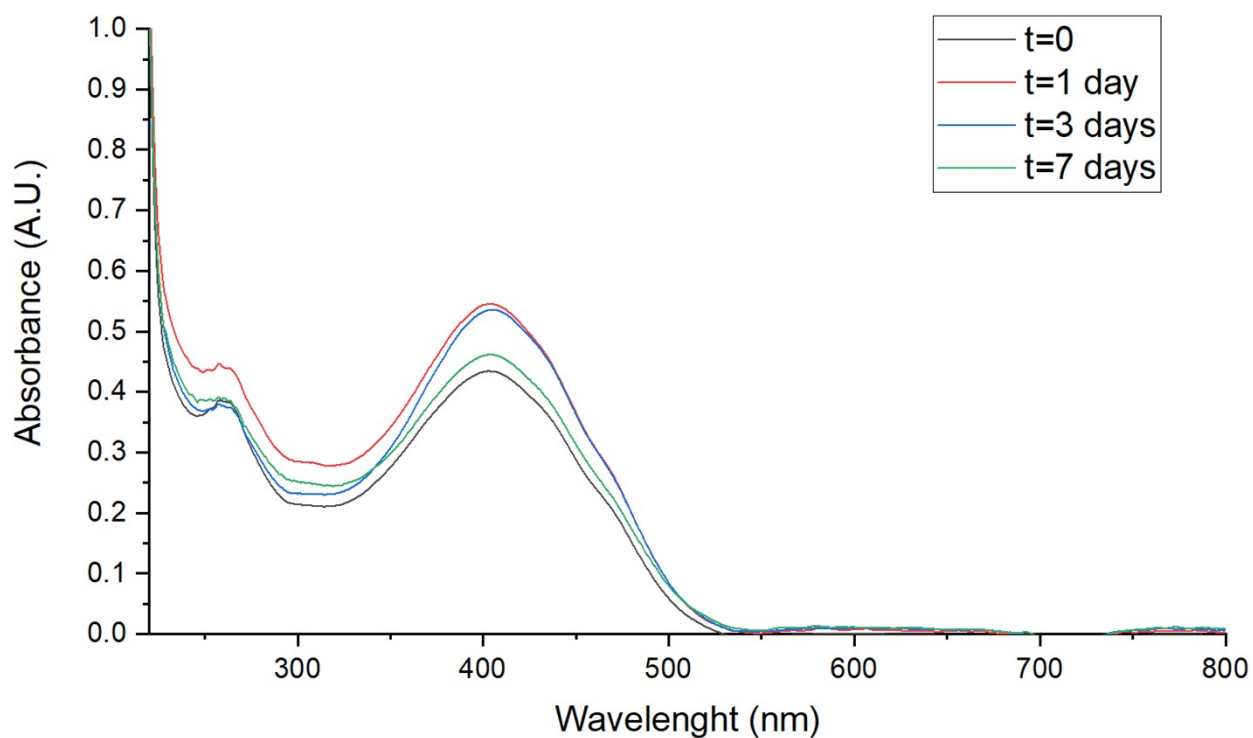

**Figure S5.** Stability studies by UV-vis of SMA-CUR in DDW at T = 4 °C. SMA-CUR = 60 µg/mL, path length 1 cm.

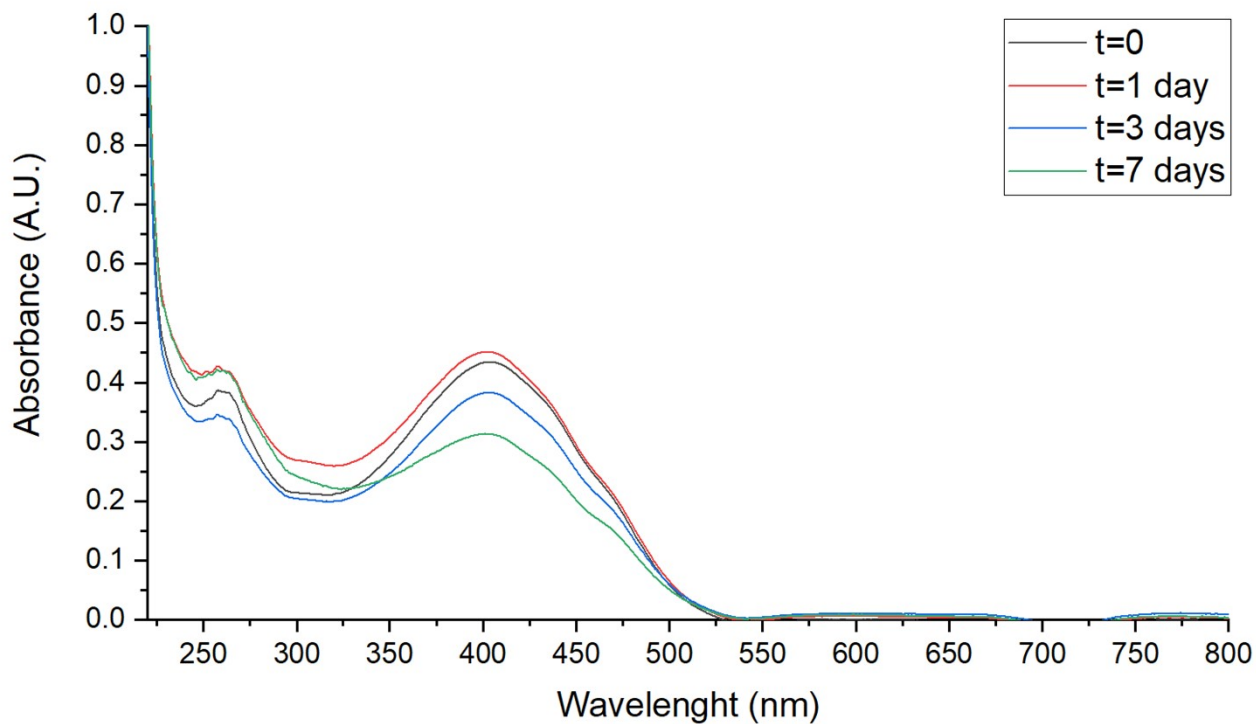

**Figure S6.** Stability studies by UV-vis of SMA-CUR in DDW at room temperature. SMA-CUR = 60  $\mu\text{g/mL}$ , path length 1 cm.

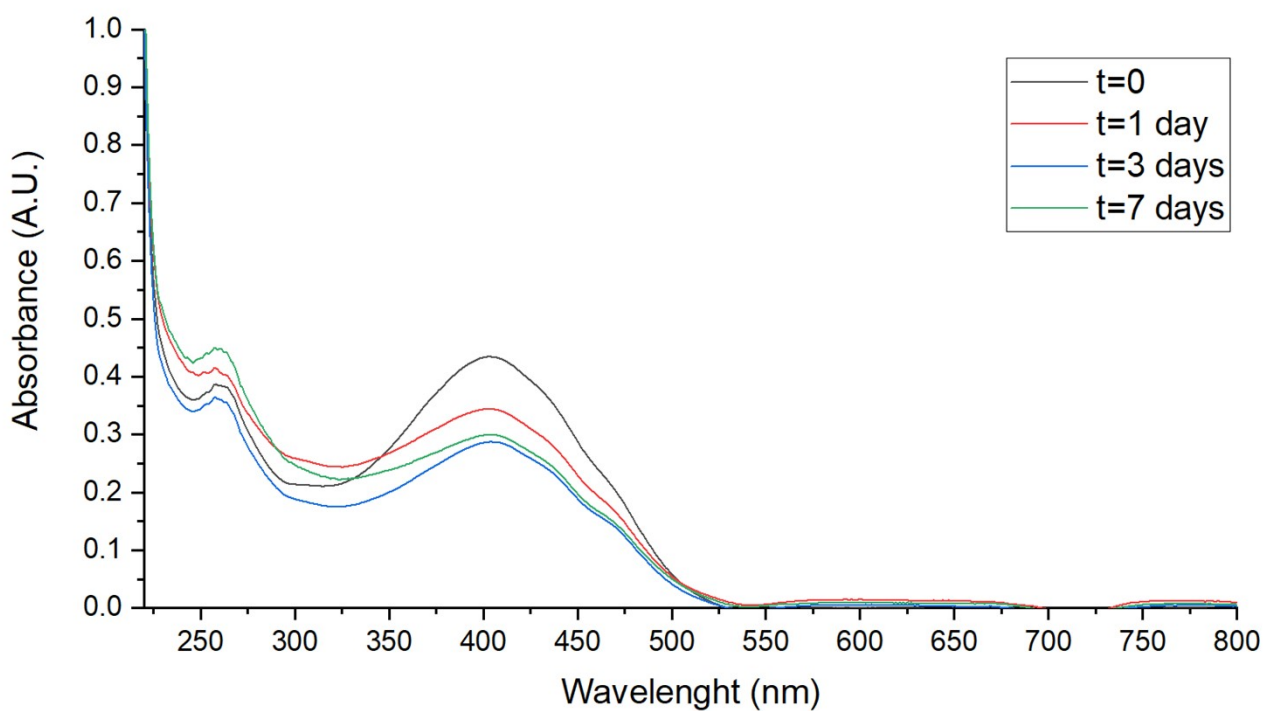

**Figure S7.** Stability studies by UV-vis of SMA-CUR in DDW at  $T = 37\text{ }^\circ\text{C}$ . SMA-CUR = 60  $\mu\text{g/mL}$ , path length 1 cm.

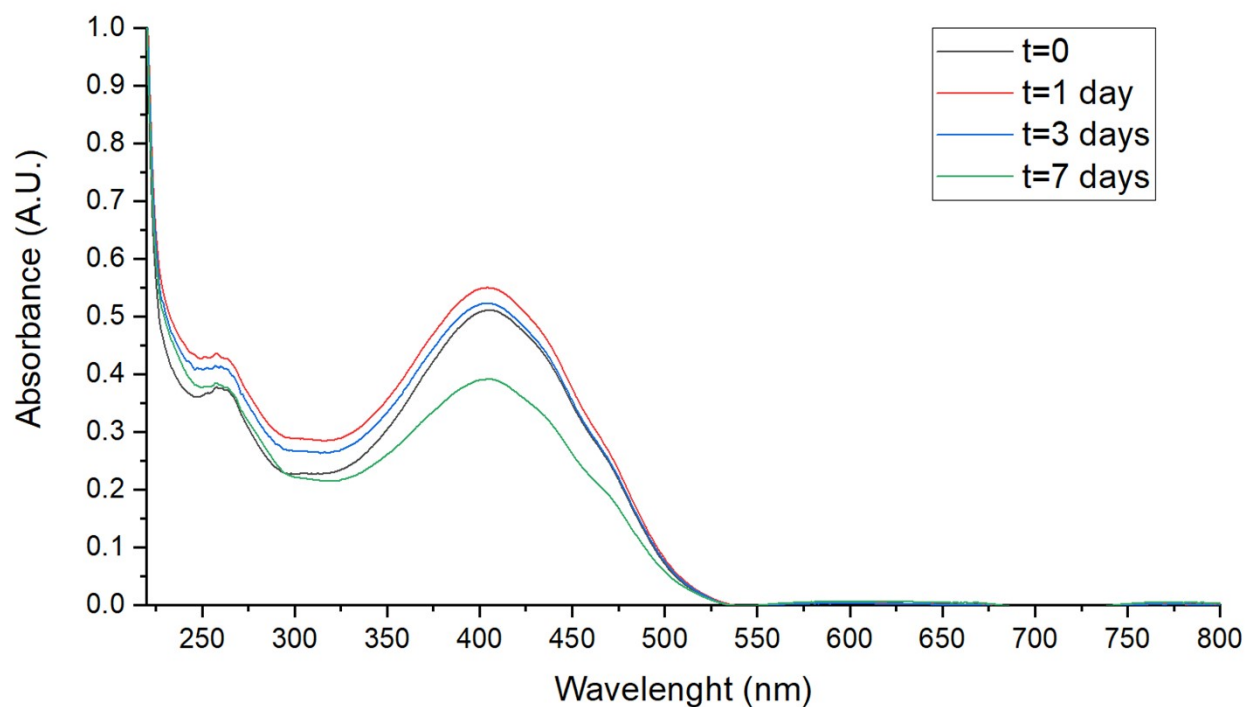

**Figure S8.** Stability studies by UV-vis of SMA-CUR in 0.9 wt % NaCl aqueous solution at room temperature. SMA-CUR = 60  $\mu\text{g}/\text{mL}$ , path length 1 cm.

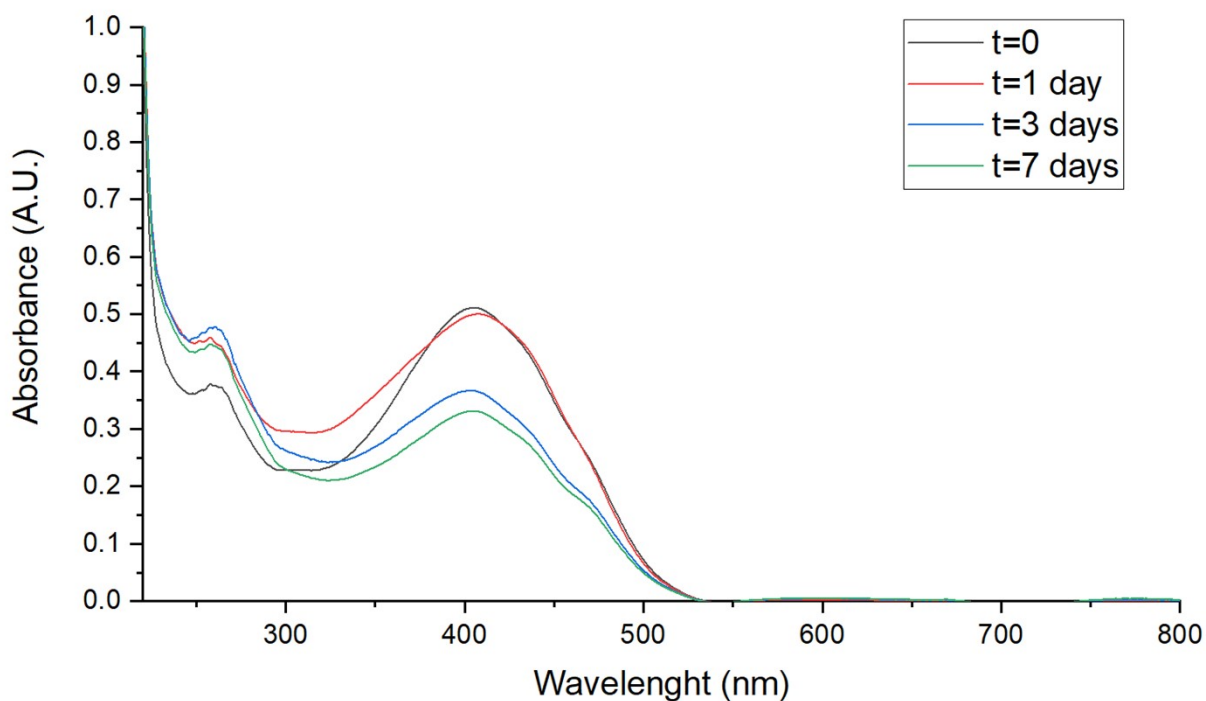

**Figure S9.** Stability studies by UV-vis of SMA-CUR in 0.9 wt % NaCl aqueous solution at  $T = 37\text{ }^{\circ}\text{C}$ . SMA-CUR = 60  $\mu\text{g}/\text{mL}$ , path length 1 cm.

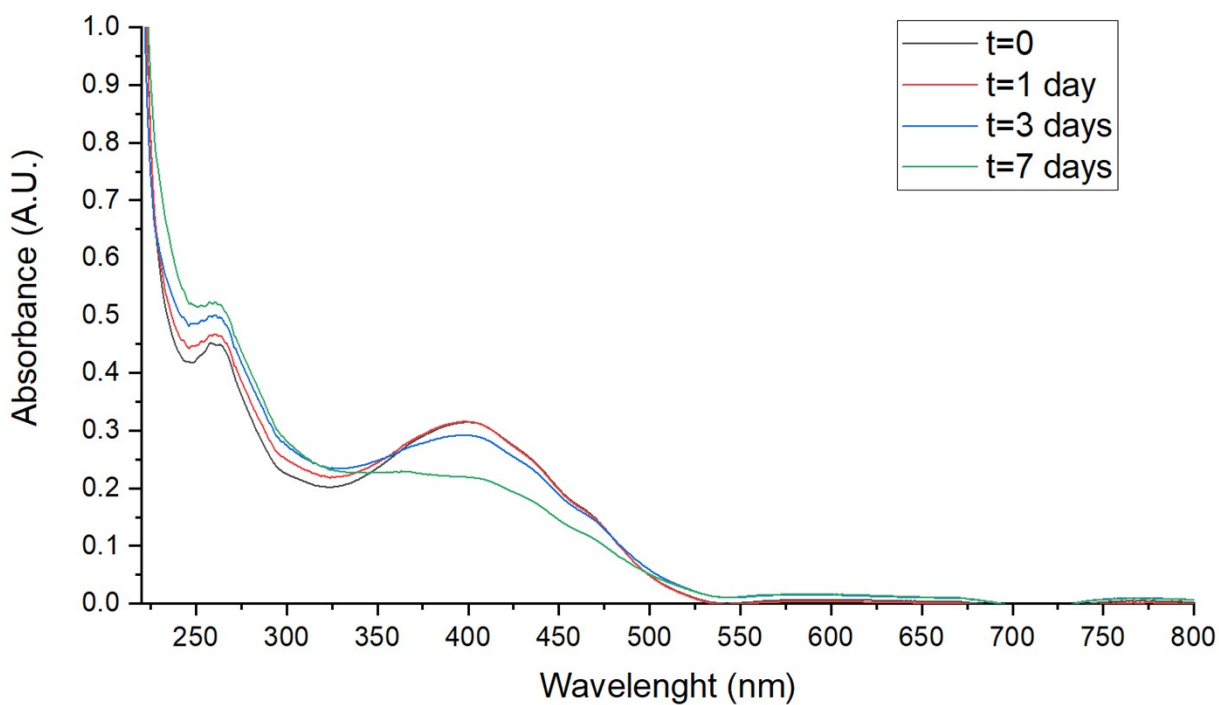

**Figure S10.** Stability studies by UV-vis of SMA-CUR in PBS aqueous solution at room temperature. SMA-CUR = 60  $\mu\text{g}/\text{mL}$ , path length 1 cm.

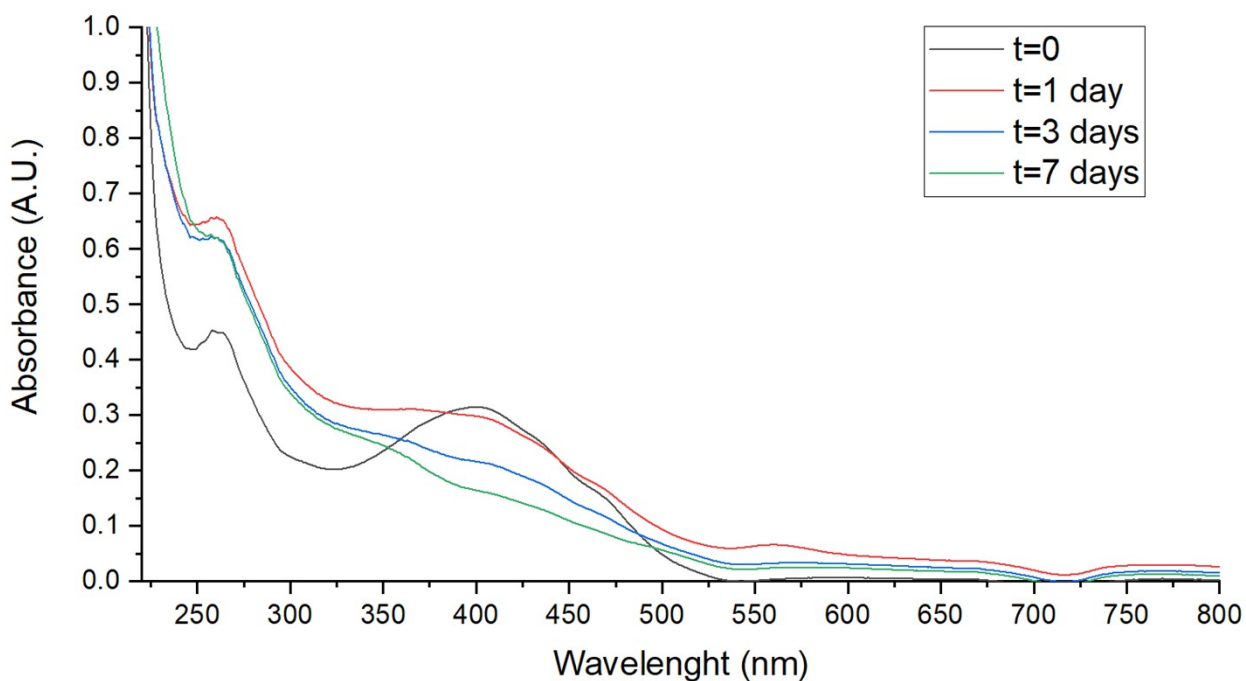

**Figure S11.** Stability studies by UV-vis of SMA-CUR in PBS aqueous solution at T = 37 °C. SMA-CUR = 60  $\mu\text{g}/\text{mL}$ , path length 1 cm.

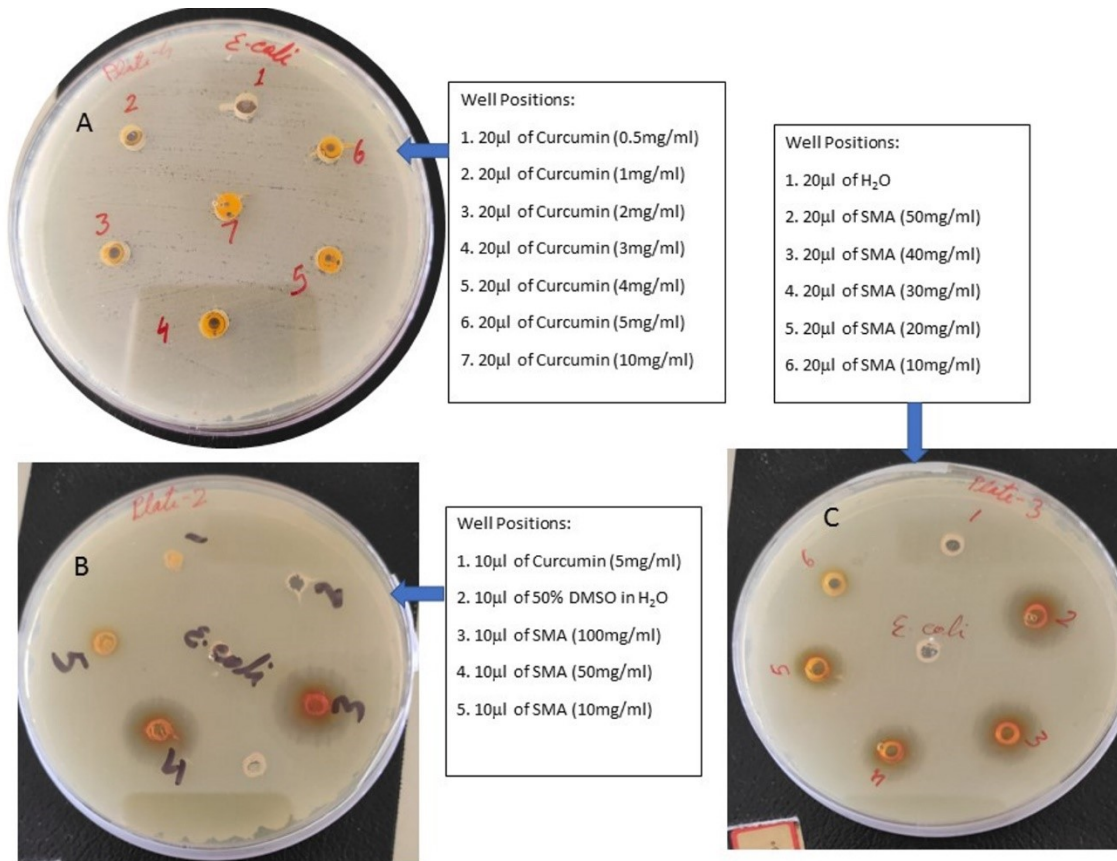

**Figure S12.** Preliminary screening for antibacterial potential of curcumin I and SMA-CUR micelles on *E. coli* isolate.
